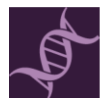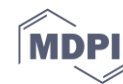

1 Article

# 2 Oxidative stress induced by tBHP in human normal colon cells 3 by label free Raman spectroscopy and imaging. The protective 4 role of natural antioxidants in the form of $\beta$ -carotene

5 B. Brozek-Pluska <sup>1,\*</sup>, K. Beton <sup>1</sup>

6 <sup>1</sup> Lodz University of Technology, Institute of Applied Radiation Chemistry, Laboratory of Laser Molecular  
7 Spectroscopy, Wroblewskiego 15, 93-590 Lodz, Poland

8 \* Correspondence: [beata.brozek-pluska@p.lodz.pl](mailto:beata.brozek-pluska@p.lodz.pl); Tel.: +48 42 631 31 65

9 **Abstract:** The present study aimed to investigate the protective effect of  $\beta$ -carotene on the oxidative  
10 stress injury of human normal colon cell line CCD-18Co triggered by tert-Butyl hydroperoxide  
11 (tBHP). XTT examination was used to determine cell viability after  $\beta$ -carotene supplementation  
12 and to determine the optimal concentration of antioxidant in spectroscopic studies. Cell biochem-  
13 istry for CCD-18Co control group, after tBHP adding and for cells in  $\beta$ -carotene - tBHP model was  
14 studied by using label-free Raman microspectroscopy. Results for stress treated CCD-18Co human  
15 colon normal cells and human colon cancer cells Caco-2 based on vibration features were also  
16 compared. Pretreatment with  $\beta$ -carotene alleviated damages in CCD-18Co human normal colon  
17 cells induced by tBHP and showed the preventative effect on cells apoptosis. Treatment with  
18  $\beta$ -carotene altered the level of ROS investigated based on intensities of Raman peaks typical for li-  
19 pids, proteins and nucleic acids. Presented study confirmed the antioxidant, protective role of  
20  $\beta$ -carotene against ROS by using spectroscopic label-free Raman techniques.

21 **Keywords:** colon cancer cells;  $\beta$ -carotene; Raman spectroscopy; Raman imaging; cancer bi-  
22 omarkers; cell line; oxidative stress

19  
20  
21  
22  
23  
24  
25  
26  
27  
28  
29  
30  
31  
32  
33  
34  
35  
36  
37  
38  
39  
40  
41  
42  
43  
44  
45  
46  
47  
48  
49  
50  
51  
52  
53  
54  
55  
56  
57  
58  
59  
60  
61  
62  
63  
64  
65  
66  
67  
68  
69  
70  
71  
72  
73  
74  
75  
76  
77  
78  
79  
80  
81  
82  
83  
84  
85  
86  
87  
88  
89  
90  
91  
92  
93  
94  
95  
96  
97  
98  
99  
100  
101  
102  
103  
104  
105  
106  
107  
108  
109  
110  
111  
112  
113  
114  
115  
116  
117  
118  
119  
120  
121  
122  
123  
124  
125  
126  
127  
128  
129  
130  
131  
132  
133  
134  
135  
136  
137  
138  
139  
140  
141  
142  
143  
144  
145  
146  
147  
148  
149  
150  
151  
152  
153  
154  
155  
156  
157  
158  
159  
160  
161  
162  
163  
164  
165  
166  
167  
168  
169  
170  
171  
172  
173  
174  
175  
176  
177  
178  
179  
180  
181  
182  
183  
184  
185  
186  
187  
188  
189  
190  
191  
192  
193  
194  
195  
196  
197  
198  
199  
200  
201  
202  
203  
204  
205  
206  
207  
208  
209  
210  
211  
212  
213  
214  
215  
216  
217  
218  
219  
220  
221  
222  
223  
224  
225  
226  
227  
228  
229  
230  
231  
232  
233  
234  
235  
236  
237  
238  
239  
240  
241  
242  
243  
244  
245  
246  
247  
248  
249  
250  
251  
252  
253  
254  
255  
256  
257  
258  
259  
260  
261  
262  
263  
264  
265  
266  
267  
268  
269  
270  
271  
272  
273  
274  
275  
276  
277  
278  
279  
280  
281  
282  
283  
284  
285  
286  
287  
288  
289  
290  
291  
292  
293  
294  
295  
296  
297  
298  
299  
300  
301  
302  
303  
304  
305  
306  
307  
308  
309  
310  
311  
312  
313  
314  
315  
316  
317  
318  
319  
320  
321  
322  
323  
324  
325  
326  
327  
328  
329  
330  
331  
332  
333  
334  
335  
336  
337  
338  
339  
340  
341  
342  
343  
344  
345  
346  
347  
348  
349  
350  
351  
352  
353  
354  
355  
356  
357  
358  
359  
360  
361  
362  
363  
364  
365  
366  
367  
368  
369  
370  
371  
372  
373  
374  
375  
376  
377  
378  
379  
380  
381  
382  
383  
384  
385  
386  
387  
388  
389  
390  
391  
392  
393  
394  
395  
396  
397  
398  
399  
400  
401  
402  
403  
404  
405  
406  
407  
408  
409  
410  
411  
412  
413  
414  
415  
416  
417  
418  
419  
420  
421  
422  
423  
424  
425  
426  
427  
428  
429  
430  
431  
432  
433  
434  
435  
436  
437  
438  
439  
440  
441  
442  
443  
444  
445  
446  
447  
448  
449  
450  
451  
452  
453  
454  
455  
456  
457  
458  
459  
460  
461  
462  
463  
464  
465  
466  
467  
468  
469  
470  
471  
472  
473  
474  
475  
476  
477  
478  
479  
480  
481  
482  
483  
484  
485  
486  
487  
488  
489  
490  
491  
492  
493  
494  
495  
496  
497  
498  
499  
500  
501  
502  
503  
504  
505  
506  
507  
508  
509  
510  
511  
512  
513  
514  
515  
516  
517  
518  
519  
520  
521  
522  
523  
524  
525  
526  
527  
528  
529  
530  
531  
532  
533  
534  
535  
536  
537  
538  
539  
540  
541  
542  
543  
544  
545  
546  
547  
548  
549  
550  
551  
552  
553  
554  
555  
556  
557  
558  
559  
560  
561  
562  
563  
564  
565  
566  
567  
568  
569  
570  
571  
572  
573  
574  
575  
576  
577  
578  
579  
580  
581  
582  
583  
584  
585  
586  
587  
588  
589  
590  
591  
592  
593  
594  
595  
596  
597  
598  
599  
600  
601  
602  
603  
604  
605  
606  
607  
608  
609  
610  
611  
612  
613  
614  
615  
616  
617  
618  
619  
620  
621  
622  
623  
624  
625  
626  
627  
628  
629  
630  
631  
632  
633  
634  
635  
636  
637  
638  
639  
640  
641  
642  
643  
644  
645  
646  
647  
648  
649  
650  
651  
652  
653  
654  
655  
656  
657  
658  
659  
660  
661  
662  
663  
664  
665  
666  
667  
668  
669  
670  
671  
672  
673  
674  
675  
676  
677  
678  
679  
680  
681  
682  
683  
684  
685  
686  
687  
688  
689  
690  
691  
692  
693  
694  
695  
696  
697  
698  
699  
700  
701  
702  
703  
704  
705  
706  
707  
708  
709  
710  
711  
712  
713  
714  
715  
716  
717  
718  
719  
720  
721  
722  
723  
724  
725  
726  
727  
728  
729  
730  
731  
732  
733  
734  
735  
736  
737  
738  
739  
740  
741  
742  
743  
744  
745  
746  
747  
748  
749  
750  
751  
752  
753  
754  
755  
756  
757  
758  
759  
760  
761  
762  
763  
764  
765  
766  
767  
768  
769  
770  
771  
772  
773  
774  
775  
776  
777  
778  
779  
780  
781  
782  
783  
784  
785  
786  
787  
788  
789  
790  
791  
792  
793  
794  
795  
796  
797  
798  
799  
800  
801  
802  
803  
804  
805  
806  
807  
808  
809  
810  
811  
812  
813  
814  
815  
816  
817  
818  
819  
820  
821  
822  
823  
824  
825  
826  
827  
828  
829  
830  
831  
832  
833  
834  
835  
836  
837  
838  
839  
840  
841  
842  
843  
844  
845  
846  
847  
848  
849  
850  
851  
852  
853  
854  
855  
856  
857  
858  
859  
860  
861  
862  
863  
864  
865  
866  
867  
868  
869  
870  
871  
872  
873  
874  
875  
876  
877  
878  
879  
880  
881  
882  
883  
884  
885  
886  
887  
888  
889  
890  
891  
892  
893  
894  
895  
896  
897  
898  
899  
900  
901  
902  
903  
904  
905  
906  
907  
908  
909  
910  
911  
912  
913  
914  
915  
916  
917  
918  
919  
920  
921  
922  
923  
924  
925  
926  
927  
928  
929  
930  
931  
932  
933  
934  
935  
936  
937  
938  
939  
940  
941  
942  
943  
944  
945  
946  
947  
948  
949  
950  
951  
952  
953  
954  
955  
956  
957  
958  
959  
960  
961  
962  
963  
964  
965  
966  
967  
968  
969  
970  
971  
972  
973  
974  
975  
976  
977  
978  
979  
980  
981  
982  
983  
984  
985  
986  
987  
988  
989  
990  
991  
992  
993  
994  
995  
996  
997  
998  
999  
1000

Academic Editor: Firstname  
Lastname

Received: date  
Accepted: date  
Published: date

**Publisher's Note:** MDPI stays neutral with regard to jurisdictional claims in published maps and institutional affiliations.

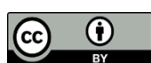

Copyright: © 2021 by the authors.

Submitted for possible open access  
publication under the terms and  
conditions of the Creative Commons  
Attribution (CC BY) license  
(<http://creativecommons.org/licenses/by/4.0/>).

## 1. Introduction

Carotenoids, also called tetraterpenoids are yellow, red and orange pigments produced by plants, fungi as well as bacteria. They are responsible for specific and well recognizable color of e.g. pumpkins, carrots, corn, tomatoes, flamingos, salmon and lobsters. There are about 600 plant pigments in the world, but only six of them have a significant impact on human body -  $\alpha$ - and  $\beta$ -carotene,  $\beta$ -cryptoxanthin, lutein, lycopene and zeaxanthin. Up to now, around thousand known carotenoids and their derivatives are categorized into two major classes, xanthophylls (including oxygen in the molecular structure) and carotenes (which are purely hydrocarbons). In plants carotenoids are accumulated in the plastids (chromatophores and chromoplasts) and play important role as structural and functional compounds. They are inactive in photosynthesis but play an auxiliary role as light-harvesting pigments, absorbing light energy for use in photosynthesis; simultaneously they provide photoprotection via non-photochemical quenching minimizing the results of photooxidative stress [1–3].

Mammals obtain carotenoids predominantly through plant foods, carnivorous animals obtain them also from animal fat [4]. In organism carotenoids are absorbed by the intestines into the blood, which transports them to various tissues in the body using lipoproteins. Approximately twenty of fat-soluble carotenoids are found in human blood and tissues [5]. In mammals  $\beta$ -carotene, vitamin E and other carotenoids are commonly perceived as antioxidants, but their biological activities are different and distinguish them from each other [6,7]. The unique biological properties of carotenoids, which influence the immune system [6,8], intercellular communication control, differentiation cells growth regulation [9] and apoptosis [10] have activated the interest in this group of compounds for many years and are crucial for the understanding of their metabolism and beneficial role for human health [11].

Because of many antioxidative properties of carotenoids, the role of this class of compounds in modulation of the cancerogenesis process also focused interest of many researchers. Plant foods were shown to be inversely associated with cancer risk in epidemiologic studies [12–14]. The significant association with cancer risk has been reported for  $\alpha$ -carotene,  $\beta$ -carotene and lycopene with breast cancer [15–22], and with ovarian cancer [23,24], for lycopene with prostate cancer [25,26], for lycopene, lutein, vitamin E and  $\beta$ -carotene with colorectal cancer [27–34]. However, not all reported results are consistent and more studies are needed to find clear relation between cancer risk and supplementation using carotenoids [35–37].

The purpose of this study was to show that the protective role of  $\beta$ -carotene against reactive oxygen species (ROS) can be investigated based on analysis of human colon single cells by using Raman spectroscopy and imaging. The influence of  $\beta$ -carotene supplementation time was also taken into cognizance.

The results for normal human colon cells, normal human colon cells exposed to oxidative stress conditions by using tBHP, normal human colon cells upon of  $\beta$ -carotene supplementation and tBHP adding and human colon cancer cells were compared.

## 2. Results

In this section, the data obtained by using Raman spectroscopy and Raman imaging for human normal colon cells before and after ROS generation, including cells supplemented with  $\beta$ -carotene before ROS injuring are presented. We will show also the comparison on results obtained for normal human colon cells CCD-18Co in oxidative stress conditions and cancer human colon cell line CaCo-2.

Generally, in the Raman vibrational spectra there are two regions of interest: the Raman fingerprint region: 500–1800  $\text{cm}^{-1}$  and the high frequency region: 2700–3100  $\text{cm}^{-1}$  (the region 1800–2700  $\text{cm}^{-1}$  is not considered for analysis due to the lack of Raman bands).

Figure 1 presents the microscopy image, Raman image of single human normal colon cell CCD-18Co constructed based on Cluster Analysis (CA) method, Raman images

of all clusters identified by CA assigned to: nucleus, mitochondria, lipid-rich regions, membrane, cytoplasm, and cell environment, fluorescence images of lipid-rich regions and nucleus, the average Raman spectrum typical for single human normal colon cell CCD-18Co presented on microscopy image, the average Raman spectra typical for CCD-18Co human normal colon cells mean  $\pm$  SD for all identified clusters for low frequency and high frequency region, and the average Raman spectrum for human normal colon cells mean  $\pm$  SD for cells as a whole, all data for experiments performed without any supplementation of  $\beta$ -carotene, cells measured in PBS, colors of the spectra correspond to the colors of clusters.

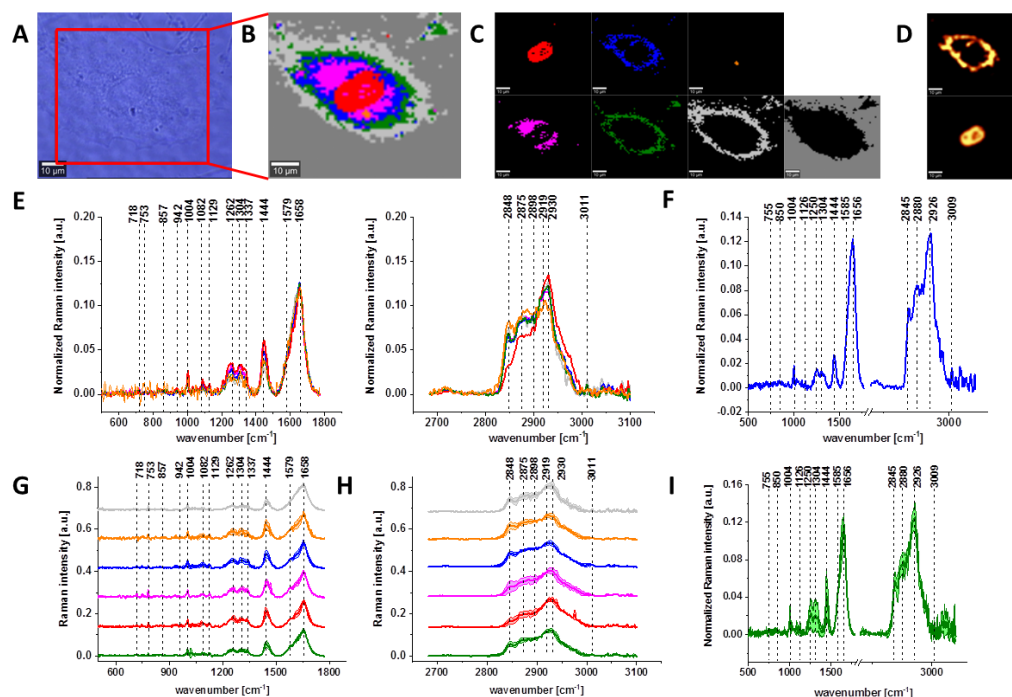

**Figure 1.** The microscopy image (A), Raman image of single human normal colon cell CCD-18Co constructed based on Cluster Analysis (CA) method (B), Raman images of all clusters identified by CA assigned to: nucleus (red), mitochondria (magenta), lipid-rich regions (blue, orange), membrane (light grey), cytoplasm (green), and cell environment (dark grey) (C), fluorescence images of lipid-rich regions (top panel) and nucleus (bottom panel) (D), the average Raman spectra typical for all clusters identified by CA for single human normal colon cell CCD-18Co (E), the average Raman spectrum typical for CCD-18Co single cell as a whole (F), the average Raman spectra typical for all clusters identified by CA typical for CCD-18-Co cells mean  $\pm$  SD: nucleus (red), mitochondria (magenta), lipid-rich regions (blue, orange), membrane (light grey), cytoplasm (green), and cell environment (dark grey) for low-(G) and high-frequency region (H), the average Raman spectrum typical for CCD-18Co cells as a whole, mean  $\pm$  SD (I), number of cells n=3, all data for experiments performed without any supplementation of  $\beta$ -carotene, cells measured in PBS, colors of the spectra correspond to the colors of clusters, excitation wavelength 532nm.

Because  $\beta$ -carotene is soluble only in organic compounds, we decided to compare the Raman spectra typical for CCD-18-Co human normal colon cells analyzed in PBS (shown in Figure 1) with results obtained for CCD-18-Co human normal colon cells after adding the same volume of organic solvent (THF/EtOH) as for 10  $\mu$ M  $\beta$ -carotene supplementation (10  $\mu$ M it was the final concentration obtained in culturing medium). The results of Raman imaging analysis of CCD-18Co human colon normal cells after adding the mixture of organic solvents to PBS including the comparison on the average Raman spectra typical for cells as whole analyzed in PBS and in PBS/THF/EtOH are shown on Figure 2.

75  
76  
77  
78  
79  
80  
81  
82  
83

84

85  
86  
87  
88  
89  
90  
91  
92  
93  
94  
95  
96  
97

98  
99  
100  
101  
102  
103  
104  
105  
106

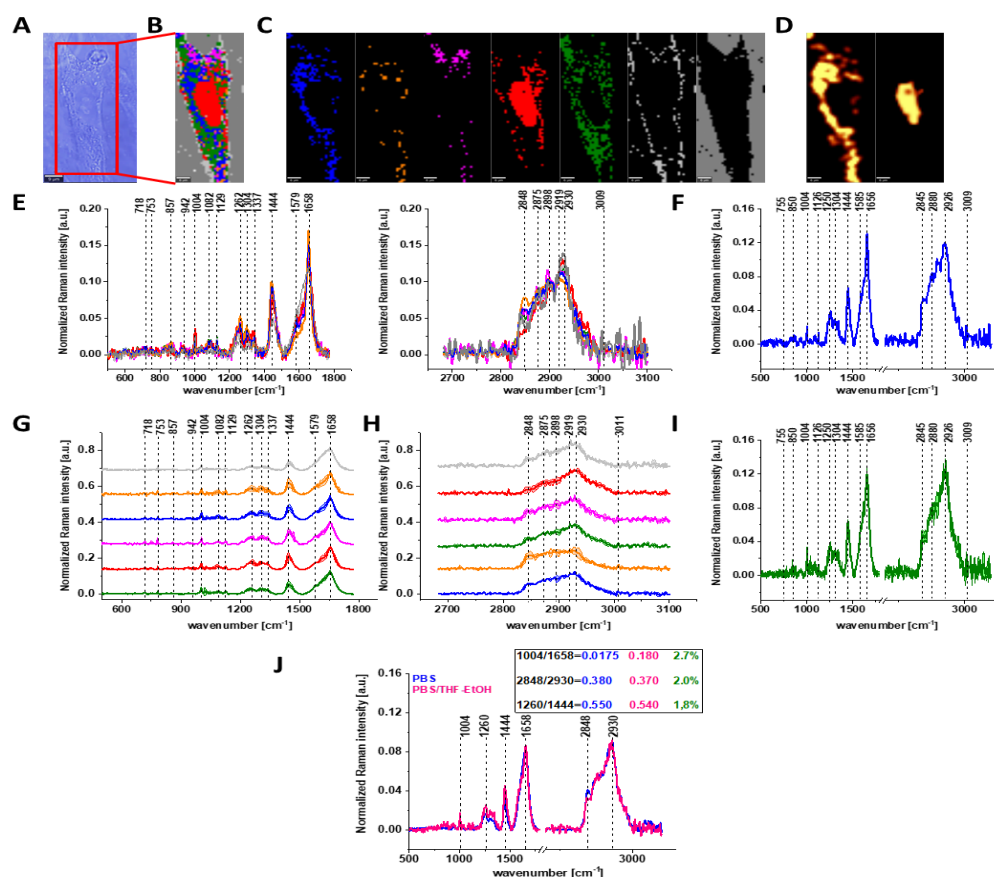

**Figure 2.** The microscopy image (A), Raman image constructed based on Cluster Analysis (CA) method (B), Raman images of all clusters identified by CA assigned to: nucleus (red), mitochondria (magenta), lipid-rich regions (blue, orange), membrane (light grey), cytoplasm (green), and cell environment (dark grey) (C), fluorescence images of lipid-rich regions (left panel) and nucleus (right panel) (D), the average Raman spectra typical of all clusters identified by CA for human colon normal single cell CCD-18Co (E), the average Raman spectrum typical for single human colon normal cell CCD-18Co as the whole (F), the average Raman spectra typical for all clusters identified by CA typical for CCD-18-Co cells mean  $\pm$  SD: nucleus (red), mitochondria (magenta), lipid-rich regions (blue, orange), membrane (light grey), cytoplasm (green), and cell environment (dark grey) for low-(G) and high-frequency region (H), the average Raman spectrum typical for CCD-18Co cells mean  $\pm$  SD (I), number of cells n=3, colors of the spectra correspond to the colors of clusters, all data for cells measured in PBS/THF/EtOH solution, excitation wavelength 532 nm, and the comparison of the average spectra for CCD-18-Co human normal colon cells in PBS/THF/EtOH – pink and in pure PBS – blue with calculated Raman bands ratios, the percentage difference between Raman peaks ratios based on average cells spectra is shown in green (J).

One can see from Figure 2 that the differences between the average Raman spectra (for cells as a whole) recorded in PBS and in PBS/THF/EtOH solution are subtle and fluctuate around 2%. Even though the difference is very slight, as the control group in all further comparisons and calculations we used results obtained for CCD-18-Co cells in PBS/THF/EtOH solution.

Results presented in Figures 1 and 2 confirm that Raman spectroscopy and imaging can be used to characterize the biochemical composition of human normal colon cells. Table 1 shows the main chemical components which can be identified based on their vibrational features in analyzed cells and the tendency in Raman peaks intensities observed for CCD-18Co human, normal colon cells in oxidative stress conditions generated by tBHP adding (discussed later in the manuscript).

107

108

109

110

111

112

113

114

115

116

117

118

119

120

121

122

123

124

125

126

127

128

129

130

131

132

133

134  
135  
136

The various signals seen on Figures 1 and 2 have been assigned to nucleic acids, proteins or lipids and provide adequate information to assess variations in spectral characteristics.

137  
138  
139  
140  
141

**Table 1.** Band positions, tentative assignments for human normal colon cells from control sample (CCD-18Co in PBS/THF/ETOH) and the tendency in Raman peaks intensities observed for CCD-18Co human, normal colon cells in oxidative stress conditions generated by tBHP adding (discussed later in the manuscript). Data based on the average Raman spectra for cells as a whole [42].

| Wavenumber [cm <sup>-1</sup> ] | Tentative assignments of Raman bands                                                                               | Tendency in Raman peak intensity observed for CCD-18Co human, normal colon cells in oxidative stress conditions generated by adding tBHP |
|--------------------------------|--------------------------------------------------------------------------------------------------------------------|------------------------------------------------------------------------------------------------------------------------------------------|
| 716                            | C-N (membrane phospholipids head)/adenine, CN <sub>2</sub> (CH <sub>3</sub> ) <sub>3</sub> (lipids), choline group | ↘                                                                                                                                        |
| 812                            | Tyrosine                                                                                                           | ↘                                                                                                                                        |
| 820                            | Structural protein modes of tumors, proteins, including collagen I                                                 | ↘                                                                                                                                        |
| 832                            | Tyrosine (Fermi resonance of ring fundamental and overtone), asymmetric O-P-O stretching, tyrosine                 | ↘                                                                                                                                        |
| 869                            | C-C stretching modes of protein                                                                                    | ↘                                                                                                                                        |
| 891                            | Protein bands, structural protein modes of tumors                                                                  | ↘                                                                                                                                        |
| 932                            | Skeletal C-C, α-helix, proline, hydroxyproline, ν(C-C) skeletal of collagen backbone                               | ↘                                                                                                                                        |
| 1004                           | Symmetric ring breathing of phenylalanine                                                                          | ↘                                                                                                                                        |
| 1078                           | Symmetric PO <sub>2</sub> <sup>-</sup> of DNA (represents more DNA in cell)                                        | ↘                                                                                                                                        |
| 1254                           | Amide III, adenine, cytosine                                                                                       | ↘                                                                                                                                        |
| 1304                           | CH <sub>2</sub> deformation (lipid), adenine, cytosine                                                             | ↘                                                                                                                                        |
| 1444                           | δ(CH <sub>2</sub> ), lipids, fatty acids                                                                           | ↘                                                                                                                                        |
| 1602                           | δ(C=C), phenylalanine (protein assignment)                                                                         | ↘                                                                                                                                        |
| 1626                           | Amide C=O stretching absorption for the b-form polypeptide films                                                   | ↘                                                                                                                                        |
| 1654                           | Amide I                                                                                                            | ↘                                                                                                                                        |
| 1720                           | C=O                                                                                                                | ↘                                                                                                                                        |
| 1754                           | C=O (lipid)                                                                                                        | ↘                                                                                                                                        |
| 2854                           | CH <sub>2</sub> symmetric stretch of lipids & CH <sub>2</sub> asymmetric stretch of lipids and proteins            | ↘                                                                                                                                        |
| 2880                           | CH <sub>2</sub> asymmetric stretch of lipids and proteins                                                          | ↘                                                                                                                                        |
| 2926                           | Symmetric CH <sub>3</sub> stretch, due primarily to                                                                | ↘                                                                                                                                        |

---

protein  
3009  $\nu_{as}(=C-H)$ , lipids, fatty acids ↘

---

142 As we mentioned above the main goal of our experiments was to prove the protec-  
143 tive role of natural antioxidants in oxidative stress conditions by using Raman spectroscopy  
144 and imaging, therefore the next step was the analysis of human colon normal cells  
145 CCD-18-Co after ROS generation. The main advantage of Raman imaging method that  
146 should be highlighted in this point is that vibrational imaging allows to investigate bio-  
147 chemical composition of cells without any cells destruction. Moreover, the high spatial  
148 resolution allows to track any changes on subcellular level.

149 Before we start the analysis of spectroscopic data we have to underline a few regu-  
150 larities.

151 ROS are produced by living organisms as a result of natural cellular metabolism, but  
152 in such a case the concentrations of them is low to moderate their functions in physio-  
153 logical cell processes, but at high ROS concentrations adverse modifications to cell com-  
154 ponents, such as: lipids, proteins, and DNA can be noticed [43–48]. The shift in balance  
155 between oxidant/antioxidant in favor of oxidants seems to be crucial for understanding  
156 many dysfunctions of human cells.

157 It has been shown in literature that oxidative stress contributes to many pathological  
158 conditions, including cancer [14–36], neurological disorders [49–52], atherosclerosis, hy-  
159 pertension, ischemia/perfusion [53–56], acute respiratory distress syndrome, idiopathic  
160 pulmonary fibrosis, chronic obstructive pulmonary disease [57], and asthma [58–60].

161 Generally, ROS can be divided into two groups: free radicals and nonradicals. Free  
162 radicals contain one or more unpaired electrons and are characterize by high reactivity to  
163 molecules. Free radicals can recombine sharing electrons and create nonradical forms.  
164 The three ROS of physiological significance are: superoxide anion ( $O_2^{\cdot-}$ ), hydroxyl radi-  
165 cal ( $OH^{\cdot}$ ), and hydrogen peroxide ( $H_2O_2$ ). Superoxide anion is formed by the addition of  
166 one electron to the molecular oxygen. This process is mediated by nicotine adenine di-  
167 nucleotide phosphate [NAD(P)H] oxidase, xanthine oxidase or by mitochondrial electron  
168 transport system. The main place where the superoxide anion is produced are mito-  
169 chondria because 1-3% of all electrons “leak” from respiration chain system and produce  
170 superoxide. Superoxide is then converted into hydrogen peroxide, which diffuses across  
171 the plasma membrane by the action of superoxide dismutases.

172 The most reactive of ROS is hydroxyl radical, which can damage proteins, lipids,  
173 carbohydrates and DNA. Hydroxyl radical can start lipid peroxidation by taking an  
174 electron from polyunsaturated fatty acids. Other oxygen-derived free radicals are the  
175 peroxyradicals ( $ROO^{\cdot}$ ). Simplest form of these radicals is hydroperoxyl radical ( $HOO^{\cdot}$ ),  
176 which plays a crucial role in fatty acid peroxidation. Free radicals can trigger lipid pe-  
177 roxidation chain reactions by abstracting a hydrogen atom from a sidechain methylene  
178 carbon. The lipid radical then reacts with oxygen to produce peroxy radical. Peroxy  
179 radical initiates a chain reaction and transforms polyunsaturated fatty acids into lipid  
180 hydroperoxides [61]. Lipid hydroperoxides are very unstable and easily decompose to  
181 secondary products, such as aldehydes. Isoprostanes are another group of lipid peroxi-  
182 dation products that are generated via the peroxidation of unsaturated fatty acids e.g.  
183 arachidonic acid.

184 Tert-Butyl hydroperoxide (tBHP) used in our experiments to produce ROS is  
185 well-known as a model substance for oxidative stress generation and subsequent analysis  
186 of cellular alterations in cells and tissues. Generally, in living organisms two pathways by  
187 which tBHP is metabolized can be distinguish; both of them induce oxidative stress. The  
188 first one provided by cytochrome P450, leads to production of peroxy and alkoxy radi-  
189 cals [62]. The second pathway employs glutathione peroxidase. Tert-Butyl  
190 hydroperoxide is detoxified to tert-butanol and reduced glutathione is depleted by oxi-  
191 dation to its disulphide form [21].

192  
193  
194  
195  
196  
197  
198  
199  
200

Figure 3 shows the microscopic image, Raman image constructed based on Cluster Analysis (CA) method, Raman images of all clusters identified by CA assigned to: nucleus, mitochondria, lipid-rich regions, membrane, cytoplasm, and cell environment, fluorescence images of lipid-rich regions and nucleus, the average Raman spectra typical of all clusters identified by CA for single human normal colon cell for low frequency and high frequency region, the average Raman spectrum typical of single CCD-18Co cell as a whole, and the average Raman spectra for human normal colon CCD-18Co cells mean  $\pm$  SD after adding tBHP for 30 minutes, colors of the spectra correspond to the colors of clusters.

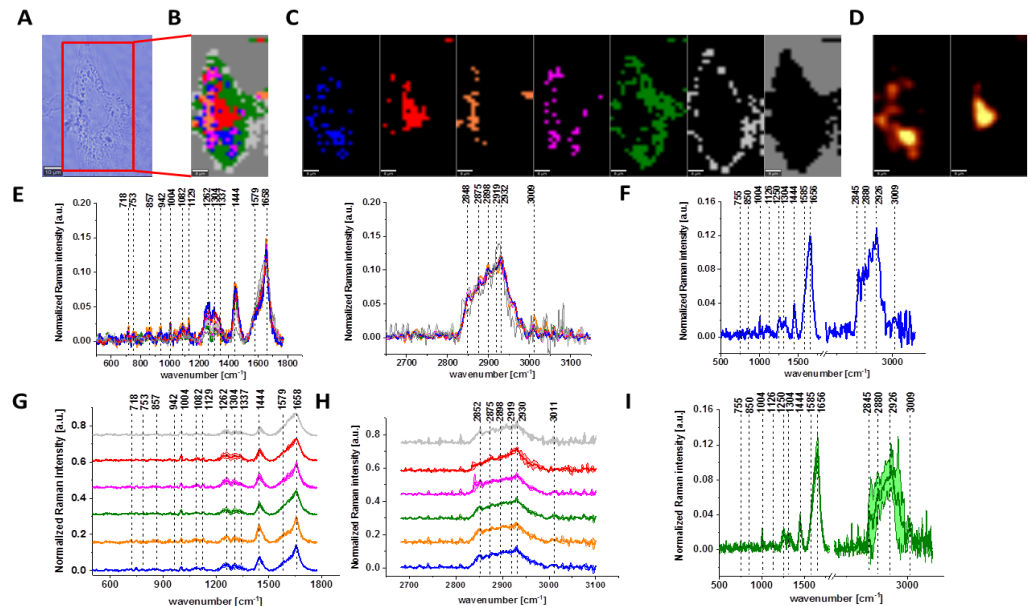

201  
202  
203  
204  
205  
206  
207  
208  
209  
210  
211  
212  
213  
214

**Figure 3.** The microscopy image (A), Raman image constructed based on Cluster Analysis (CA) method (B), Raman images of all clusters identified by CA assigned to: nucleus (red), mitochondria (magenta), lipid-rich regions (blue, orange), membrane (light grey), cytoplasm (green), and cell environment (dark grey) (C), fluorescence images of lipid-rich regions (left panel) and nucleus (right panel) (D), average Raman spectra typical for all clusters identified by CA for single human normal colon cell (E), average Raman spectrum typical for CCD-18Co single cell as a whole (F), average Raman spectra typical for all clusters identified by CA typical for CCD-18-Co cells mean  $\pm$  SD: nucleus (red), mitochondria (magenta), lipid-rich regions (blue, orange), membrane (light grey), cytoplasm (green), and cell environment (dark grey) for low-(G) and high-frequency region (H), average Raman spectrum typical for CCD-18Co cells as a whole mean  $\pm$  SD (I) after adding of tBHP for 30 minutes (final concentration in medium  $c=200 \mu\text{M}$ ), number of cells  $n=3$ , colors of the spectra correspond to the colors of clusters, all data performed for PBS/THF/EtOH solution, excitation wavelength 532 nm.

215  
216  
217  
218  
219  
220  
221  
222  
223  
224

Based on high resolved Raman spectra recorded for normal human colon cells CCD-18Co and for individual organelles without and after adding tBHP for ROS generation shown in Figures 2 and 3 one can obtain the complex information about the biochemistry of single cell as a whole or we can track changes in cell's nucleus, mitochondria, and lipid structures. Figure 4 and Table 1 show the main spectroscopic differences detected based on vibrational Raman spectra before and after oxidative stress generation.

Figure 4 shows the difference Raman spectrum of human normal colon cells from control sample (CCD-18Co in PBS/THF/ETOH solution) and human normal colon cells in oxidative stress conditions generated by tBHP adding (data based on the Raman vibrational spectra for cells as a whole).

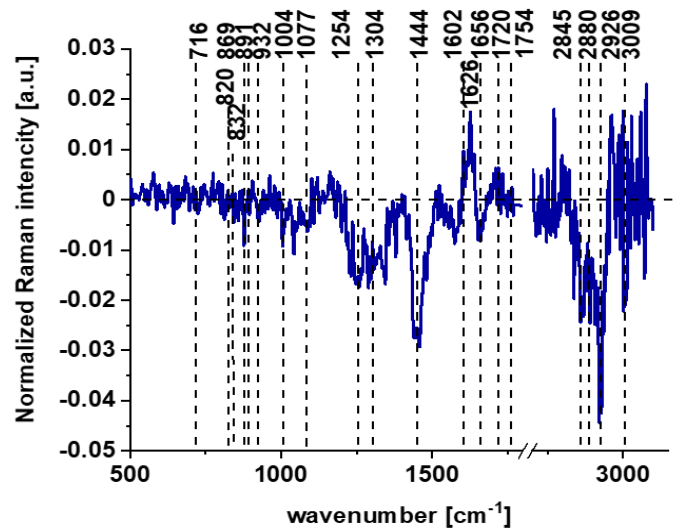

225

226

227

228

229

230

231

232

233

234

235

236

237

238

239

**Figure 4.** The difference spectrum calculated for human colon normal cells CCD18-Co control group and human normal colon cells CCD18-Co in oxidative stress conditions generated by tBHP adding (data based on the Raman vibrational spectra for cells as a whole).

One can see from Figure 4 that ROS generation has changed the biochemical composition of normal human colon cells CCD18-Co. In detail changes noticed in Figure 4 will be discussed in the manuscript later. The tendency in Raman peaks intensities observed for CCD-18Co human, normal colon cells after ROS generation by tBHP adding for cells as a whole is also shown in Table 1. As we have stressed above Raman microspectroscopy and Cluster Analysis of Raman data allow to observed the influence of ROS generation on individual organelles of human, normal, CCD18-Co cells. Figure 5 shows the difference spectra (green) calculated for nucleus, mitochondria, lipids structures, cell membrane and cytoplasm in high frequency region (A) and in low frequency region (B) based on the average Raman spectra typical for all clusters assigned to the subcellular structures for cells in control group (blue) and after tBHP adding (red).



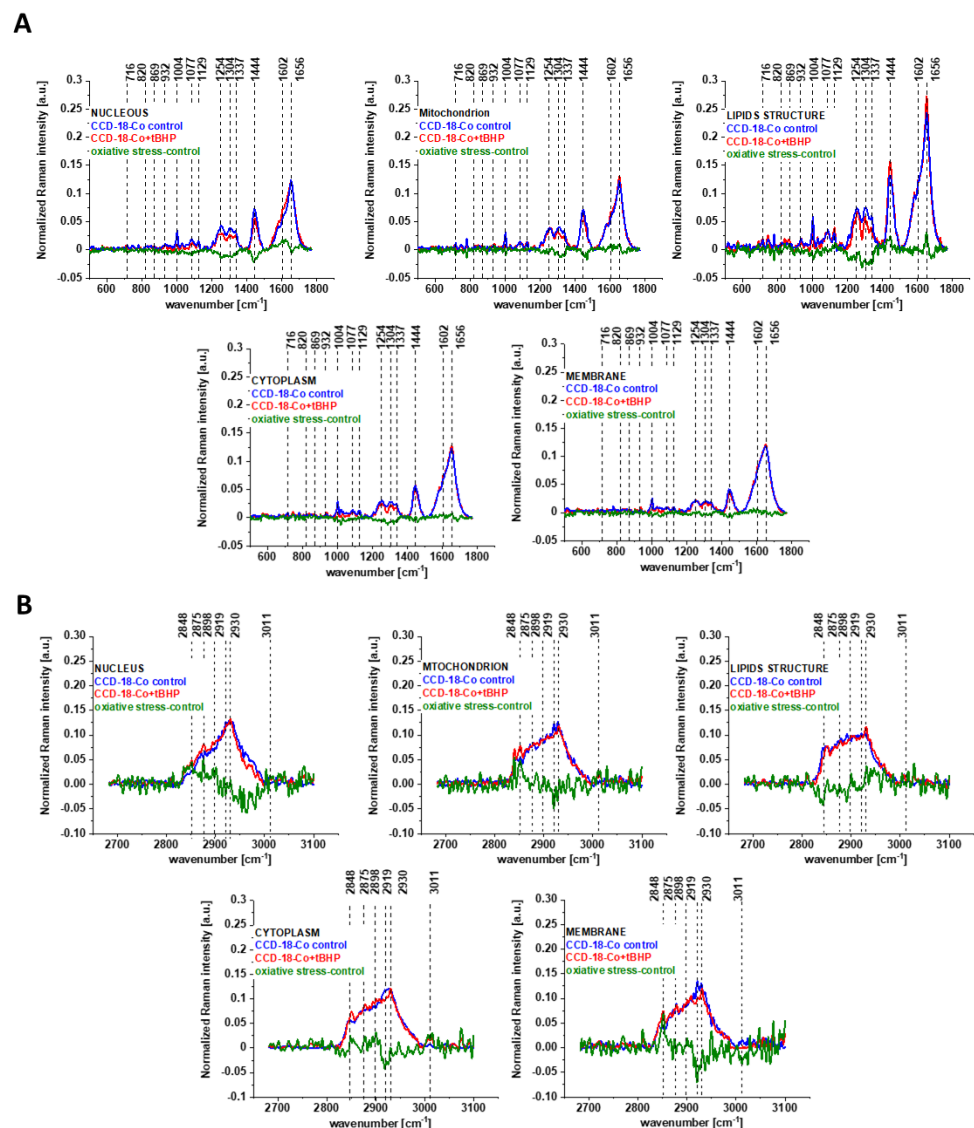

**Figure 5.** The difference spectra (green) calculated for nucleus, mitochondria, lipids structures, cell membrane and cytoplasm in low frequency region (A) and in high frequency region (B) based on the average Raman spectra typical of clusters assigned to the subcellular structures for CCD-18- Co cells in control group (blue) and after adding tBHP (red).

Figure 5 shows that the generation of ROS affects the intensity of the Raman signal assigned to all selected organelles of human normal CCD18-Co colon cells. This observation confirms that ROS generation can affect the function of all cell substructures.

The next step of the analysis was the interpretation of Raman data obtained for CCD18-Co human normal colon cells at first supplemented by  $\beta$ -carotene for 24 or 48 hours and then treated using tBHP for 30 min.

Figure 6 shows all results obtained for human normal colon cells CCD-18Co after 24 h of  $\beta$ -carotene supplementation and then adding of tBHP for 30 min.

240  
241  
242  
243  
244  
245  
246  
247  
248  
249  
250  
251  
252

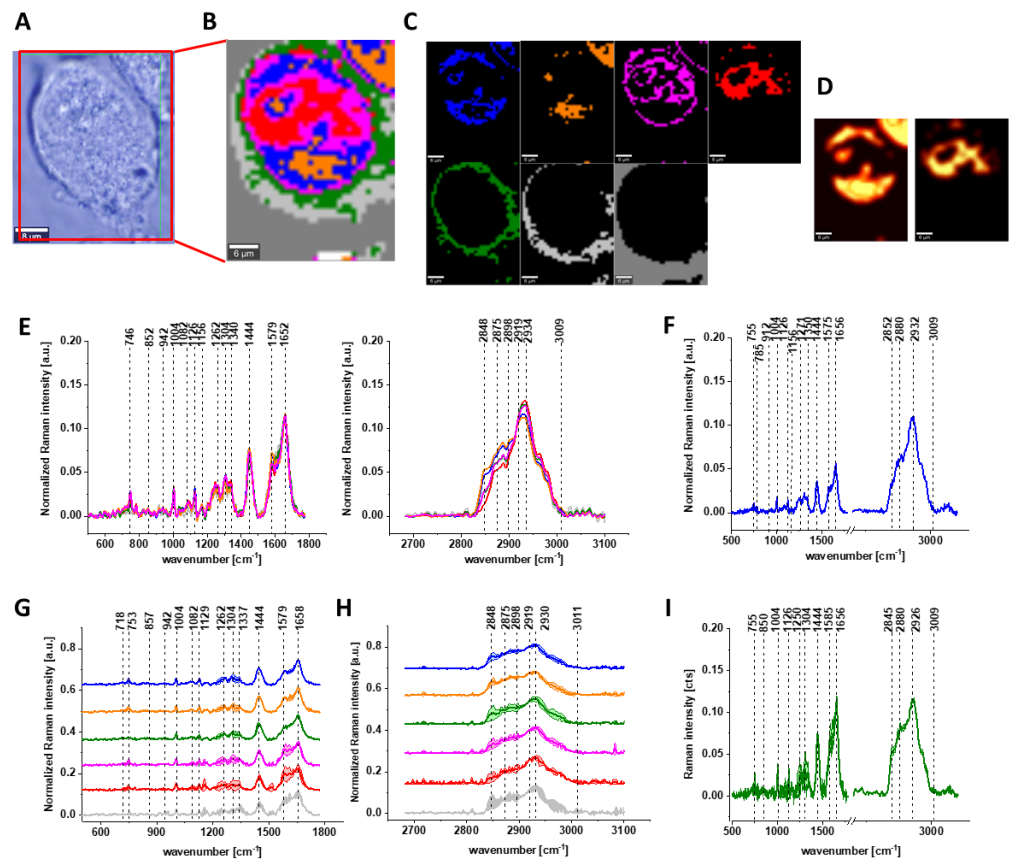

253

254

255

256

257

258

259

260

261

262

263

264

265

266

267

268

**Figure 6.** The microscopy image (A), Raman images of all clusters identified by Cluster Analysis (CA) method (B), Raman images of clusters identified by CA assigned to: nucleus (red), mitochondria (magenta), lipid-rich regions (blue, orange), membrane (light grey), cytoplasm (green), and cell environment (dark grey) (C), fluorescence images of lipid-rich regions (left panel) and nucleus (right panel) (D), average Raman spectra typical for all clusters identified by CA for single human colon cell (E), average Raman spectrum typical for CCD-18Co single cell as a whole (F), average Raman spectra typical for all clusters identified by CA typical for CCD-18-Co cells mean  $\pm$  SD: nucleus (red), mitochondria (magenta), lipid-rich regions (blue, orange), membrane (light grey), cytoplasm (green), and cell environment (dark grey) for low-(G) and high-frequency region (H), average Raman spectrum typical for CCD-18Co cells as a whole mean  $\pm$  SD (I) for human normal colon cells CCD-18Co after at first  $\beta$ -carotene supplementation for 24 hours and then adding of tBHP for 30 minutes, number of cells  $n=3$ , colors of the spectra correspond to the colors of clusters, all data obtained for PBS/THF/EtOH solution, excitation wavelength 532 nm.

Figure 7 shows all results obtained for human normal colon cells CCD-18Co after 48 h of  $\beta$ -carotene supplementation and then adding of tBHP for 30 min.

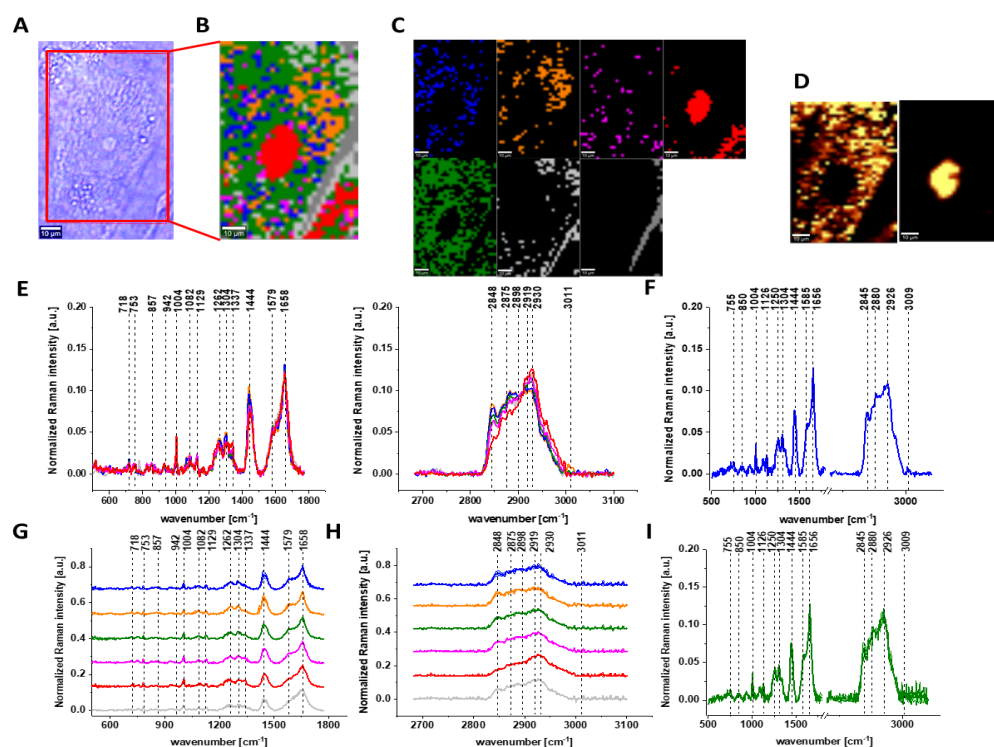

**Figure 7.** The microscopy image (A), Raman image constructed based on Cluster Analysis (CA) method (B), Raman images of all clusters identified by CA assigned to: nucleus (red), mitochondria (magenta), lipid-rich regions (blue, orange), membrane (light grey), cytoplasm (green), and cell environment (dark grey) (C), fluorescence images of lipid-rich regions (left panel) and nucleus (right panel) (D), average Raman spectra typical for all clusters identified by CA for single human colon cell (E), average Raman spectrum typical for CCD-18Co single cell as a whole (F), average Raman spectra typical for all clusters identified by CA typical for CCD-18-Co cells mean  $\pm$  SD: nucleus (red), mitochondria (magenta), lipid-rich regions (blue, orange), membrane (light grey), cytoplasm (green), and cell environment (dark grey) for low-(G) and high-frequency region (H), average Raman spectrum typical for CCD-18Co cells as a whole mean  $\pm$  SD (I) for human normal colon cells CCD-18Co after at first  $\beta$ -carotene supplementation for 48 hours and then adding of tBHP for 30 minutes, number of cells  $n=3$ , colors of the spectra correspond to the colors of clusters, all data for PBS/THF/EtOH solution.

One can see from Figures 6 and 7 that also for conditions including  $\beta$ -carotene supplementation and ROS generation we can obtain high resolved Raman spectra based on which the influence on biochemistry of single cells of antioxidant supplementation and oxidative stress can be analyzed.

### 3. Discussion

Having reached this point when the analysis based on Raman vibrational spectra for different human normal colon CCD-18Co cells groups has been performed we can compare and discuss results shown on Figures 1-7.

Considering that CCD18-Co human normal colon cells are basically composed of three types of macromolecules: proteins, nucleic acids and lipids, in order to explore characteristic changes under ROS conditions we will focused the attention to these class of compounds. The qualitative and quantitative comparison between paired bands assigned to proteins, lipids and nucleic acids will continue to be discussed according to the biological attribution of them.

Based on the results shown in Table 1 and frequencies highlighted in Figures 1-7 we have chosen the following Raman bands to compare: 812, 832, 869, 932, 1004, 1254, 1654  $\text{cm}^{-1}$ .

269

270

271

272

273

274

275

276

277

278

279

280

281

282

283

284

285

286

287

288

289

290

291

292

293

294

295

296

297

298

299

300 Figure 8 shows the comparison of Raman band intensity ratios for four different  
301 human normal colon cells groups: control group, group treated by using tBHP for  
302 30 min, group at first supplemented with  $\beta$ -carotene for 24h and after that incubated with  
303 tBHP for 30 min, and group at first supplemented with  $\beta$ -carotene for 48 h and after that  
304 incubated with tBHP for 30 min.

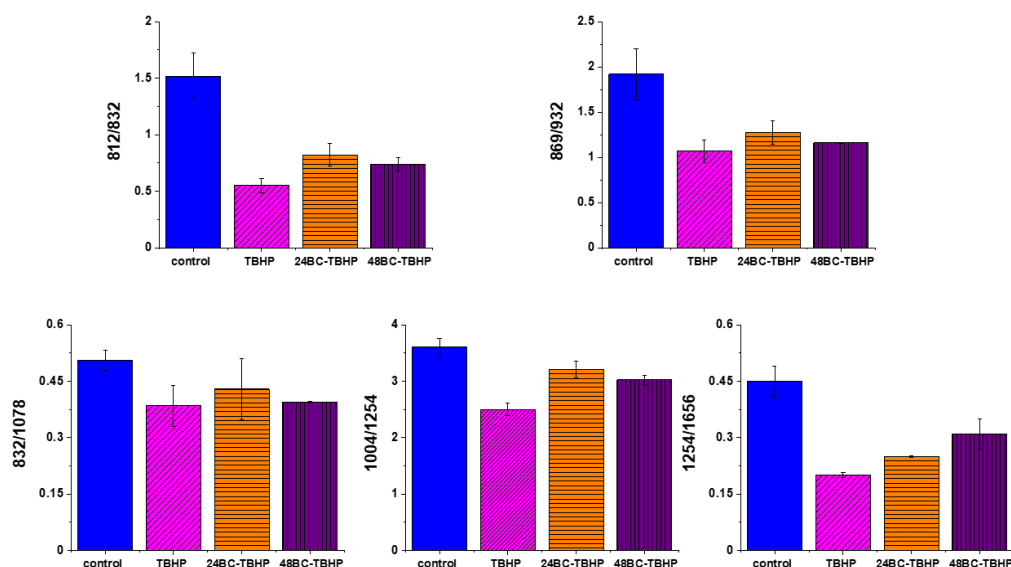

305  
306 **Figure 8.** Raman band intensities ratios for selected Raman bands corresponding to proteins  
307 812/832, 869/932, 832/1078, 1004/1254, 1254/1656 for four groups of normal human colon cells  
308 CCD18-Co: control group (labeled control, blue), group after ROS generation by using tBHP (la-  
309 beled with TBHP, magenta), cells group at first supplemented with  $\beta$ -carotene for 24 h and then  
310 treated by tBHP (labeled 24BC-TBHP, orange), group at first supplemented with  $\beta$ -carotene for  
311 48 h and then treated by tBHP (labeled 24BC-TBHP, violet).

312 Compared with the oxidation group (magenta), the relative intensities of several  
313 protein bands 812/832, 869/932, 1004/1254 and 832/1078 (the ratio for Raman bands typi-  
314 cal for protein (tyrosine) and DNA) in the control (blue) and protective groups (at first  
315 supplemented by  $\beta$ -carotene, orange and violet) show the same variation trend.

316 In detail for Raman bands at 812 and 832  $\text{cm}^{-1}$  for tBHP group (after ROS generation)  
317 compare to control one the decreasing for Raman bands ratio  $I_{812}/I_{832}$  was observed. De-  
318 creasing observed in the oxidation group, indicates that tyrosine and its internal 'out of  
319 plane ring breathing mode' was affected by oxidation. Such interaction suggests that the  
320 molecular vibration of tyrosine is sensitive to oxidation, resulting in structural changes.  
321 The adding of  $\beta$ -carotene before ROS generation results in increasing of analyzed ratio  
322 compared to the oxidation group.

323 The bands at 869 and 932  $\text{cm}^{-1}$  also correspond to proteins. The band 869  $\text{cm}^{-1}$  came  
324 from C-C stretching modes of proteins, while the band at 932  $\text{cm}^{-1}$  correspond to C-C  
325 stretching vibrational mode of proline, valine and protein backbone ( $\alpha$ -helix confor-  
326 mation). One can see from Figure 8 that the ratio of Rama band intensities  $I_{869}/I_{932}$  is sig-  
327 nificantly decreased in the oxidation group, and once again, increased after adding  
328  $\beta$ -carotene. Although the observed increasing confirms the protective role of  $\beta$ -carotene,  
329 still the relative intensity is lower than observed for the control group. Summarizing, all  
330 observations made for the ratio  $I_{869}/I_{932}$  indicate that tBHP changes the content and  
331 structure of some amino acids by reaction of ROS with proteins, resulting in concertation  
332 modulation and functional damage of them. This observation is consistent with data  
333 published in the literature [63]. The same trend was observed for the ratio calculated  
334 based on the Raman bands corresponding to phenylalanine (1004  $\text{cm}^{-1}$ ) and Amide III.  
335 Once again one can observe the decreasing of the ratio for oxidation group and protective  
336 role of the antioxidant even if the values for 24BC+tBHP and 48BC+tBHP groups are

337 lower than typical for control cells. The same variation for all analyzed cells groups was  
338 noticed for Raman bands 1245 and 1656  $\text{cm}^{-1}$ . The decreasing of the ratio  $I_{1254}/I_{1656}$  for ROS  
339 injured cells and systematic increase of this ratio as a function of incubation time with  
340  $\beta$ -carotene was observed. Moreover, the change of band ratio of amides  $I_{1254}/I_{1656}$  may  
341 suggest also that a desamidization was triggered and resulted in modification of the  
342 spatial structure of proteins, in loss of protein activity or modification of their biological  
343 function [64].

344 The analysis of Raman bands ratios has been performed also for bands typical for  
345 nucleic acids and lipids. Figure 9 shows the results obtained for these types of com-  
346 pounds.

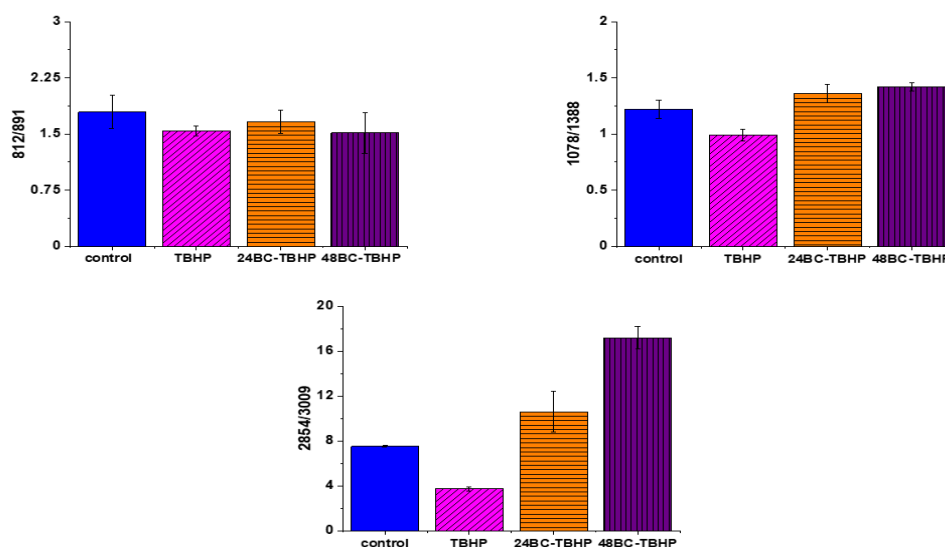

347  
348 **Figure 9.** Raman band intensities ratios for selected Raman bands corresponding to nucleic acids  
349 812/891, 1078/1368 and lipids 2854/3009 for four groups of normal human colon cells CCD18-Co:  
350 control group (labeled control, blue), group after ROS generation by using tBHP (labeled with  
351 TBHP, magenta), cells group at first supplemented with  $\beta$ -carotene for 24 h and then treated by  
352 tBHP (labeled 24BC-TBHP, orange), group at first supplemented with  $\beta$ -carotene for 48 h and then  
353 treated by tBHP (labeled 48BC-TBHP, violet).

354 For bands typical for nucleic acids (812, 891, 1078, 1388  $\text{cm}^{-1}$ ) and lipids (2854,  
355 3009  $\text{cm}^{-1}$ ) once again as for bands typical for proteins we have noticed changes induced  
356 by ROS and modulations triggered by  $\beta$ -carotene supplementation. Lipids are the main  
357 component of subcellular structures like lipid droplets and the cell membrane, which is  
358 susceptible to peroxidation induced by ROS. Products from ROS reaction can cause  
359 damage to either the cell membrane or the organelle membrane [65,66]. The main pro-  
360 tective role of  $\beta$ -carotene in this case was seen for lipids fraction, especially unsaturated  
361 one observed in high-frequency region. We have to remember that lipids peroxidation is  
362 a process that consists of three phases: initiation, propagation and termination. In the in-  
363 itiation phase, the hydrogen atom is separated from the molecule of polyunsaturated  
364 fatty acid or the rest of such acid that is part of the phospholipid under the influence of  
365 e.g. the hydroxyl radical ( $\text{OH}^\cdot$ ). In the propagation phase reactions alkyl free radicals re-  
366 act with oxygen to form peroxide free radicals, which detach hydrogen atoms from sub-  
367 sequent, undamaged molecules of unsaturated fatty acids. This reaction produces fatty  
368 acid peroxide and another alkyl radical which can be oxidized another molecule of fatty  
369 acid. The above reactions can repeat many times, which leads to the transformation into  
370 peroxides - several, several dozen or even several hundred fatty acid molecules. Lipid  
371 peroxidation products change the physical properties of all cell membranes. For phos-  
372 pholipids located inside the lipid bilayer, introduced polar peroxide, ketone and alde-  
373 hyde groups remain or hydroxy. This lowers the hydrophobicity of the lipid interior of

cell membranes, as well as changes the organization of the lipid bilayer, which to disturbance of lipid asymmetry of membranes [67].

We also noticed also that the  $\beta$ -carotene may affect the ROS damages induced in nucleic acids (812/893, 1078/1386)). DNA ROS damage effect may involve two aspects, nucleic acid bases and DNA phosphoric acid skeleton [68]. ROS are well known as mediators of double strand breaks (DSBs), which can be mutagenic due to chromosomal rearrangements or loss of genetic information due to erroneous DNA repair. ROS have also been reported to directly induce other forms of DNA damage through oxidizing nucleoside bases e.g. formation of 8-oxo guanine) [69], which can lead to G-T or G-A transversions if unrepaired. Oxidized bases are typically recognized and repaired by the Base Excision Repair (BER) pathway, but when they occur simultaneously on opposing strands, attempted BER can lead to the generation of DSBs [70]. It has been shown that ROS accumulation also induces mitochondrial DNA lesions, strand breaks and degradation of mitochondrial DNA [71]. Data presented on Figure 9 confirm that based on Raman spectra the changes in DNA after ROS generation can be tracked.

It has been shown that permanent changes in the genome of cells e.g. as a result of oxidative stress, it is the first stage characteristic of the process of mutagenesis, carcinogenesis and cell aging. The appearance of a mutation in DNA is a critical step in the process of cancer development and more than 100 DNA modifications have been identified in cancer cells products [72].

Finally, we have decided to compare the results obtained for CCD18-Co human normal colon cells in oxidative stress conditions with data obtained for CaCo-2 human cancer cell line. Figure 10 shows the data obtained for human cancer colon cells CaCo-2. Figure 11 the comparison for selected Raman bands typical for proteins, nucleic acids and lipids.

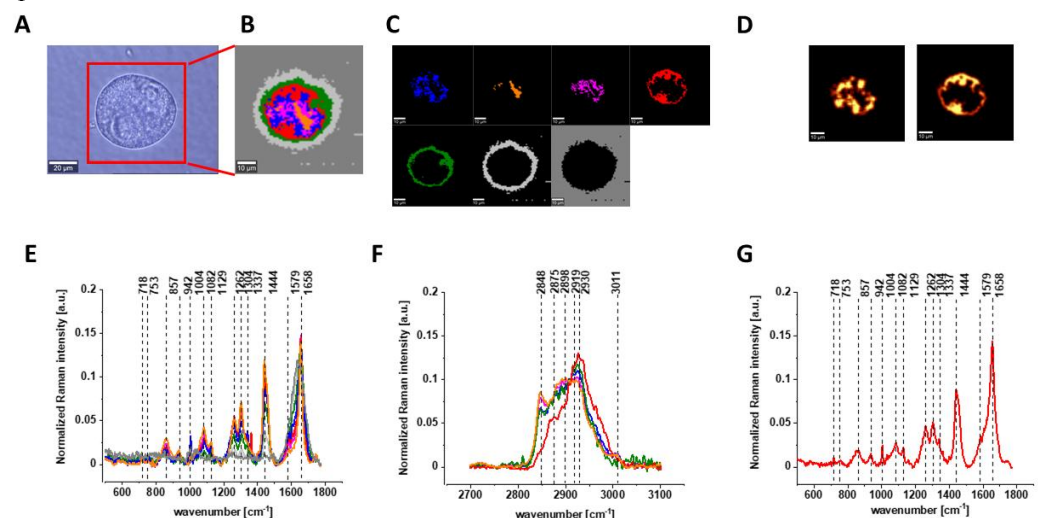

**Figure 10.** The microscopy image (A), Raman image constructed based on Cluster Analysis (CA) method (B), Raman images of all clusters identified by CA assigned to: nucleus (red), mitochondria (magenta), lipid-rich regions (blue, orange), membrane (light grey), cytoplasm (green), and cell environment (dark grey) (C), fluorescence images of lipid-rich regions (left panel) and nucleus (right panel) (D), average Raman spectra typical for all clusters identified by CA for single cancer human colon cell CaCo-2 in a low- (E) and high-frequency region (F), average Raman spectrum typical for CaCo-2 single cell as a whole (G), colors of the spectra correspond to the colors of clusters, all data for PBS/THF/EtOH solution.

Figure 11 shows the comparison of ratios for selected Raman bands typical for proteins, nucleic acids and lipids for CCD-18Co human normal colon cells, CCD-18Co human normal colon cells after ROS generation by adding of tBHP for 30 min. and CaCo-2 human cancer colon cells.

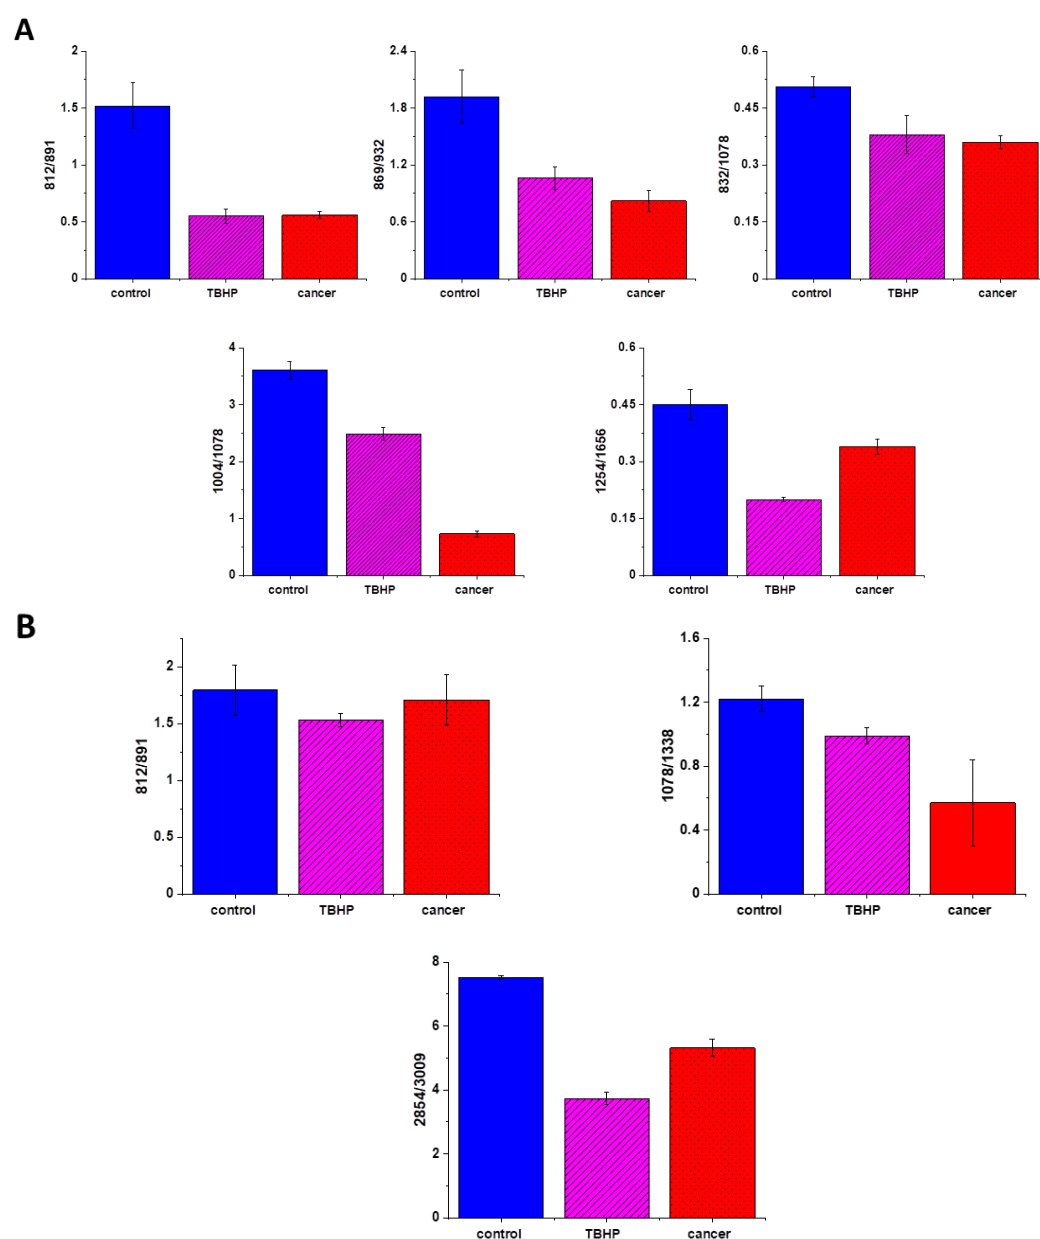

412

413

414

415

416

417

418

419

420

421

422

423

424

425

426

427

428

429

**Figure 11.** Raman band intensities ratios for selected Raman bands corresponding to proteins 812/832, 869/932, 832/1078, 1004/1254, 1254/1656, (A), nucleic acids lipids 812/891, 1078/1368 and 2854/3009 (B) for three groups of human colon cells: CCD18-Co cells - control group (labeled with control, blue), CCD18-Co after ROS generation by using tBHP (labeled with TBHP, magenta), and CaCo-2 human cancer cells (labeled CaCo-2, red).

One can see from Figure 11 that intensities of Raman band typical for proteins, nucleic acids and lipids are comparable for CCD18-Co human normal colon cells in oxidative stress conditions and for CaCo-2 human colon cancer cell and simultaneously differ significantly from control group. This observation confirm that Raman band intensities analysis allow to track biochemical changes induced by ROS and during cancerogenesis. Moreover, comparable ratios for ROS injured cells and cancer cells may confirm that cells altered by ROS shows many common characteristic with pathological cells.

## 4. Materials and Methods

### Cell culture

CCD-18Co (CRL-1459) cell line was purchased from ATCC and cultured using ATCC-formulated Eagle's Minimum Essential Medium, Catalog No. 30-2003. To make the complete growth medium, the fetal bovine serum to a final concentration of 10% was added. Every 2 to 3 days the new medium was used. CaCo-2 cell line was also purchased from ATCC and cultured according to the ATCC protocols. The base medium for this cell line was ATCC-formulated Eagle's Minimum Essential Medium, Catalog No. 30-2003. To make the complete growth medium, we have added fetal bovine serum to a final concentration of 20%. Medium was renewed 1 to 2 times a week. Cells used in the experiments were stored in an incubator providing environmental conditions at 37 °C, 5% CO<sub>2</sub>, 95% air. For all results presented in this manuscript we have recorded the Raman spectra and imaging for paraformaldehyde fixed cells. The procedure for fixed cells was as follows: cells were seeded onto CaF<sub>2</sub> windows (25 × 1 mm) at a low density of 103 cells/cm<sup>3</sup>. After 24 h or 48 h incubation on the CaF<sub>2</sub> slides with β-carotene (c=10 μM) the tBHP for a final concentration of 200 μM was added for 30 min, after a half hour the cells were rinsed with phosphate-buffered saline (PBS, SIGMA P-5368, pH 7.4 at 25 °C, c= 0.01 M) to remove any residual medium or/and any residual β-carotene, fixed in paraformaldehyde (4% buffered formaldehyde) for 10 minutes and washed twice with distilled water. The Raman confocal measurements were performed immediately after the preparation of the samples.

### Raman spectra and imaging acquisition and analysis

All Raman images and spectra reported in this manuscript were recorded using the alpha 300 RSA+ confocal microscope (WITec, Ulm, Germany) using a 50 μm core diameter fiber, 532 nm excitation line, an imaging spectrograph/monochromator (Acton-SP-2300i), a CCD camera (Andor Newton DU970-UVB-353) and an Ultra High Throughput Spectrometer (UHTS 300). Excitation laser line was focused on the samples through a 40 x water dipping objective (NA: 1.0). The average laser excitation power was 10 mW, with integration time of 1.0 sec for low-frequency region and 0.5 sec for high-frequency region. Edge filters were used to remove the Rayleigh scattered light. A piezoelectric table was used to record Raman images. Spectra were collected at one acquisition per pixel. The cosmic rays were removed from each Raman spectrum (model: filter size: 2, dynamic factor: 10) and the Savitzky–Golay smoothing procedure was also implemented (model: order: 4, derivative: 0). Data acquisition and processing were performed using WITec Project Plus software.

All imaging data were analyzed using the Cluster Analysis method (CA) implemented in WITec Project Plus software. Briefly, CA allows to group objects. Vibrational spectra in our studies were analyzed in such a way that in the same group called a cluster were gathered all Raman spectra resembling each other, Raman spectra characterize by different vibrational features created another cluster. CA was performed using WITec Project Plus model (Centroid) with the k-means algorithm (each cluster was represented by a single mean vector). The normalization was performed using Origin software (model: divided by the norm).

### Chemical compounds

β-carotene catalogue Number C9750, Luperox<sup>®</sup> TBH70X, tert-Butyl hydroperoxide solution catalogue Number 458139, bisBenzimide H 33342 trihydrochloride catalogue Number B2261, Red Oil-O catalogue Number O0625 were purchased from Sigma-Aldrich, and used without additional purification. XTT proliferation Kit with catalogue Number 20-300-1000 was purchased from Biological Industries.



479  
480  
481  
482  
483  
484  
485  
486  
487  
488  
489  
490  
491  
492  
493  
494  
495  
496  
497  
498  
499  
500  
501  
502  
503  
504  
505  
506  
507  
508  
509  
510  
511  
512

### XTT cells viability tests

Tetrazolium salts have been widely used for many years as detection reagents in histochemical and cell biology tests [38,39]. The second generation tetrazolium dye, XTT, can be effectively used in tests to assess viability and proliferation, metabolic cytotoxicity, respiratory chain activity and apoptotic cells [39–41].

The use of the XTT reagent is based on the statistical calculation of the metabolic activity of cells using a colorimetric technique which is a reaction to the changed environmental conditions in which they are located. The XTT test requires the use of a wavelength of 450 nm, from which the specific signal of the sample is obtained, and 650 nm constituting the reference sample during the test. The XTT test was used to calculate the metabolic activity of a living cell.

Soletetrazoliums are converted in cells with the help of special enzymes called doformazan, however, this reaction occurs properly only in cells with undamaged metabolism. The XTT test counts the final amount of formazan and converts it to the number of live cells. The advantage of the XTT test is the fact that this reagent is soluble in water, thanks to which the first representative readings can be obtained after about 3 hours of incubation. The sensitivity of the XTT test can be significantly increased thanks to the use of an intermediate electron carrier - PMS (n-methylidibenzopyrazine methyl sulfate) - which catalyzes the reduction of XTT and formation of a formazan derivative. The PMS activation reagent is included with the XTT in the ATCC XTT Cell Proliferation Assay Kit (ATCC®30-1011K™) that was used for the cell culture studies in this work.

XTT tests on cell lines were carried out on a multi-sensing BioTek Synergy HT model reader designed for microplate testing. The test protocol was created especially for the presented experiments. After the microplate was applied to the reader, the inside of which was at a room temperature of 20–22°C, the sample underwent a pre-mixing process. Then, the actual measurement was carried out, consisting in examining the signal coming from the sample with excitation at 450 nm. After measuring the samples, the instrument carried out a reference measurement with excitation at 650 nm wavelength. After this sequence the microplate was removed from the reader.

The stress compound solutions were prepared by pre-diluting it in the PBS solvent. After obtaining the initial concentration of 20,000 µM, it was diluted in a medium intended for a given type of cells, so as to obtain the final concentration of 200 µM.

Scheme 1 shows the results of XTT test obtained for CCD-18Co human, normal, colon cells incubated with β-carotene in various concentrations and in various time.

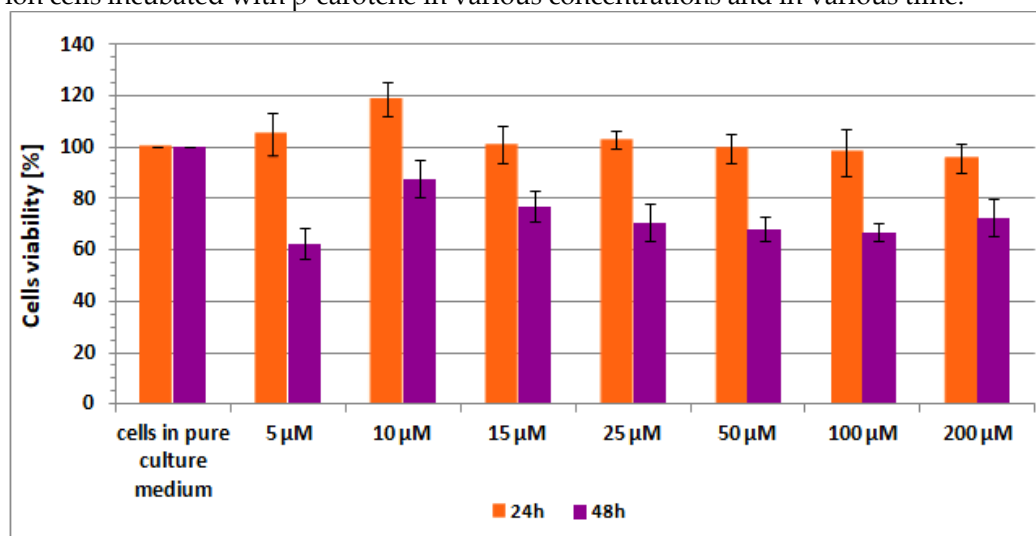

513  
514  
515

**Scheme 1.** Results of XTT analysis obtained for CCD-18Co human, normal, colon cells supplemented with different concentrations of β-carotene in different time intervals.

## 5. Conclusions

In the presented work, we performed label-free detection of tBHP-induced oxidative stress by using Raman imaging and spectroscopy. We have shown that Raman imaging and spectroscopy are capable to characterize and differentiate human normal colon cells CCD-18Co, human normal colon cells after ROS generation, human normal colon cells at first incubated with  $\beta$ -carotene and after that treated by using tBHP, and finally human, cancer colon cells CaCo-2.

Moreover, we have confirmed that substructures of human colon single cells such as: nucleus, mitochondria lipid-rich regions, membrane, and cytoplasm can be precisely visualized based on Raman spectra. Moreover, biochemical changes typical for selected cells substructures can be tracked based on vibrational features.

We have shown also that fluorescence based images accurately correspond to the Raman images confirming localization of cells substructures such as: nucleus and lipids-rich structures.

Based on Raman band intensities attributed to proteins, nucleus acids and lipids as well as ratios 812/832, 869/932, 832/1078, 1004/1254, 1254/1656, 812/891, 1078/1368 2854/3009 calculated based on them, we have confirmed the protective role of  $\beta$ -carotene for cells in oxidative stress conditions for label-free and nondestructive spectroscopic method.

**Supplementary Materials:** The following are available online at [www.mdpi.com/xxx/s1](http://www.mdpi.com/xxx/s1), Figure S1: title, Table S1: title, Video S1: title.

**Author Contributions:** Conceptualization, B.B-X.; methodology, B.B-P., K.B.; formal analysis, B.B-P.; investigation, B.B-P, K.B.; writing—original draft preparation, B.B-P.; writing—review and editing, B.B-P., K.B.; supervision, B.B-P.; project administration, B.B-P.; funding acquisition, B.B-P. All authors have read and agreed to the published version of the manuscript.

**Funding:** This research was funded by the National Science Centre of Poland (Narodowe Centrum Nauki) UMO-2017/25/B/ST4/01788.

**Conflicts of Interest:** The authors declare no competing interests. The funders had no role in the design of the study; in the collection, analyses, or interpretation of data; in the writing of the manuscript, or in the decision to publish the results.

## References

1. Stahl, W.; Sies, H.  $\beta$ -Carotene and other carotenoids in protection from sunlight. *Am. J. Clin. Nutr.* 2012, 96, 1179S–1184S, doi:10.3945/ajcn.112.034819.
2. Stahl, W.; Sies, H. Bioactivity and protective effects of natural carotenoids. *Biochim. Biophys. Acta - Mol. Basis Dis.* 2005, 1740, 101–107, doi:10.1016/j.bbadis.2004.12.006.
3. Bartley, G.E.; Scolnik, P.A. Plant carotenoids: Pigments for photoprotection, visual attraction, and human health. *Plant Cell* 1995, 7, 1027–1038, doi:10.1105/tpc.7.7.1027.
4. Olson, J.A. Carotenoids and human health. *Arch. Latinoam. Nutr.* 1999, 49, 7S–11S, doi:10.3390/books978-3-03921-833-2.
5. Johnson, E.J. The role of carotenoids in human health. *Nutr. Clin. Care* 2002, 5, 56–65, doi:10.1046/j.1523-5408.2002.00004.x.
6. Hughes, D.A.; Wright, A.J.A.; Finglas, P.M.; Polley, A.G.J.; Bailey, A.L.; Astley, S.B.; Southon, S. Effects of lycopene and lutein supplementation on the expression of functionally associated surface molecules on blood monocytes from healthy male nonsmokers. *J. Infect. Dis.* 2000, 182, doi:10.1086/315910.
7. Hughes, D.A.; Wright, A.J.A.; Finglas, P.M.; Peerless, A.C.J.; Bailey, A.L.; Astley, S.B.; Pinder, A.C.; Southon, S. The effect of  $\beta$ -carotene supplementation on the immune function of blood monocytes from healthy male nonsmokers. *J. Lab. Clin. Med.* 1997, 129, 309–317, doi:10.1016/S0022-2143(97)90179-7.
8. Moriguchi, S.; Muraga, M. Vitamin E and immunity. *Vitam. Horm.* 2000, 59, 305–336, doi:10.1016/s0083-6729(00)59011-6.
9. Palozza, P.; Calviello, G.; Serini, S.; Maggiano, N.; Lanza, P.; Ranelletti, F.O.; Bartoli, G.M.  $\beta$ -Carotene at high concentrations induces apoptosis by enhancing oxy-radical production in human adenocarcinoma cells. *Free Radic. Biol. Med.* 2001, 30, 1000–1007, doi:10.1016/S0891-5849(01)00488-9.
10. Turley, J.M.; Funakoshi, S.; Ruscelli, F.W.; Kasper, J.; Murphy, W.J.; Longo, D.L.; Birchenall-Roberts, M.C. Growth inhibition and apoptosis of RL human B lymphoma cells by vitamin E succinate and retinoic acid: Role for transforming growth factor  $\beta$ . *Cell Growth Differ.* 1995, 6, 655–663.

- 568 11. Kaczor, A.; Baranska, M. *Carotenoids: Nutrition, Analysis and Technology*; Kaczor, A., Baranska, M., Eds.; John Wiley & Sons,  
569 Ltd: Chichester, UK, 2016; ISBN 9781118622223.
- 570 12. Hultén, K.; Van Kappel, A.L.; Winkvist, A.; Kaaks, R.; Hallmans, G.; Lenner, P.; Riboli, E. Carotenoids, alpha-tocopherols, and  
571 retinol in plasma and breast cancer risk in northern Sweden. *Cancer Causes Control* 2001, 12, 529–537,  
572 doi:10.1023/A:1011271222153.
- 573 13. Steinmetz, K.A.; Potter, J.D. Vegetables, fruit, and cancer. I. Epidemiology. *Cancer Causes Control* 1991, 2, 325–357,  
574 doi:10.1007/BF00051672.
- 575 14. Potter, J.D.; Slattery, M.L.; Bostick, R.M.; Gapstur, S.M. *Colon Cancer : A Review of the Epidemiology*. 1993, 15.
- 576 15. Slattery Martha L.; Potter John D.; Coates Ashley; Ma Khe-Ni; Berry T. Dennis; Duncan Debra M.; Caan Bette J. Plant Foods  
577 and Colon Cancer: An Assessment of Specific Foods and Their Related Nutrients . *Cancer Causes Control* 1997, 8, 575–590.
- 578 16. Brozek-Pluska, B.; Jarota, A.; Jablonska-Gajewicz, J.; Kordek, R.; Czajkowski, W.; Abramczyk, H. Distribution of  
579 Phthalocyanines and Raman reporters in human cancerous and Noncancerous breast tissue as studied by Raman imaging.  
580 *Technol. Cancer Res. Treat.* 2012, 11, 317–331, doi:10.7785/tcrt.2012.500280.
- 581 17. Abramczyk, H.; Brozek-Pluska, B.; Surmacki, J.; Musial, J.; Kordek, R.; Microspectroscopy, R. Oncologic photodynamic diag-  
582 nosis and therapy: confocal Raman/fluorescence imaging of metal phthalocyanines in human breast cancer tissue in vitro.  
583 *Analyst* 2014, 139, 5547–5559, doi:10.1039/c4an00966e.
- 584 18. Abramczyk, H.; Imiela, A.; Brozek-Pluska, B.; Kopec, M. Advances in Raman imaging combined with AFM and fluorescence  
585 microscopy are beneficial for oncology and cancer research. *Nanomedicine - Futur. Med.* 2019, 14, 1873–1888,  
586 doi:10.2217/nmm-2018-0335.
- 587 19. Brozek-Pluska, B.; Kopec, M.; Abramczyk, H. Development of a new diagnostic Raman method for monitoring epigenetic  
588 modifications in the cancer cells of human breast tissue. *Anal. Methods* 2016, 8, 8542–8553, doi:10.1039/c6ay02559e.
- 589 20. Abramczyk, H.; Brozek-Pluska, B. Raman imaging in biochemical and biomedical applications. Diagnosis and treatment of  
590 breast cancer. *Chem. Rev.* 2013, 113, 5766–5781.
- 591 21. Abramczyk, H.; Brozek-Pluska, B.; Jarota, A.; Surmacki, J.; Imiela, A.; Kopec, M. A look into the use of Raman spectroscopy for  
592 brain and breast cancer diagnostics: linear and non-linear optics in cancer research as a gateway to tumor cell identity. *Expert*  
593 *Rev. Mol. Diagn.* 2020, 20, 99–115, doi:10.1080/14737159.2020.1724092.
- 594 22. Abramczyk, H.; Brozek-Pluska, B.; Surmacki, J.; Jablonska-Gajewicz, J.; Kordek, R. Raman “optical biopsy” of human breast  
595 cancer. *Prog. Biophys. Mol. Biol.* 2012, 108, 74–81, doi:10.1016/j.pbiomolbio.2011.10.004.
- 596 23. Cramer, D.W.; Kuper, H.; Harlow, B.L.; Titus-Ernstoff, L. Carotenoids, antioxidants and ovarian cancer risk in pre- and post-  
597 menopausal women. *Int. J. Cancer* 2001, 94, 128–134, doi:10.1002/ijc.1435.
- 598 24. Vecchia, C. La Tomatoes, lycopene intake, and digestive tract and female hormone-related neoplasms. *Exp. Biol. Med.* 2002,  
599 227, 860–863, doi:10.1177/153537020222701004.
- 600 25. Vogt, T.M.; Mayne, S.T.; Graubard, B.I.; Swanson, C.A.; Sowell, A.L.; Schoenberg, J.B.; Swanson, G.M.; Greenberg, R.S.; Hoo-  
601 ver, R.N.; Hayes, R.B.; et al. Serum lycopene, other serum carotenoids, and risk of prostate cancer in US Blacks and Whites.  
602 *Am. J. Epidemiol.* 2002, 155, 1023–1032, doi:10.1093/aje/155.11.1023.
- 603 26. Giovannucci, E.; Rimm, E.B.; Liu, Y.; Stampfer, M.J.; Willett, W.C. A prospective study of tomato products, lycopene, and  
604 prostate cancer risk. *J. Natl. Cancer Inst.* 2002, 94, 391–398, doi:10.1093/jnci/94.5.391.
- 605 27. Slattery, M.L.; Benson, J.; Curtin, K.; Ma, K.N.; Schaeffer, D.; Potter, J.D. Carotenoids and colon cancer. *Am. J. Clin. Nutr.* 2000,  
606 71, 575–582, doi:10.1093/ajcn/71.2.575.
- 607 28. Slattery, M.L.; Edwards, S.L.; Anderson, K.; Caan, B. Vitamin E and colon cancer: Is there an association? *Nutr. Cancer* 1998, 30,  
608 201–206, doi:10.1080/01635589809514664.
- 609 29. Wu, K.; Willett, W.C.; Chan, J.M.; Fuchs, C.S.; Colditz, G.A.; Rimm, E.B.; Giovannucci, E.L.; Epidemiology C W, of W. A  
610 Prospective Study on Supplemental Vitamin E Intake and Risk of Colon Cancer in Women and Men A Prospective Study on  
611 Supplemental Vitamin E Intake and Risk of Colon Cancer in Women and Men 1. *Cancer Epidemiol. Biomarkers Prev.* 2002, 11,  
612 1298–1304.
- 613 30. Ferraroni, M.; La Vecchia, C.; D’Avanzo, B.; Negri, E.; Franceschi, S.; Decarli, A. Selected micronutrient intake and the risk of  
614 colorectal cancer. *Br. J. Cancer* 1994, 70, 1150–1155, doi:10.1038/bjc.1994.463.
- 615 31. Bostick, R.M.; Potter, J.D.; McKenzie, D.R.; Sellers, T.A.; Kushi, L.H.; Steinmetz, K.A.; Folsom, A.R. Reduced Risk of Colon  
616 Cancer with High Intake of Vitamin E: The Iowa Women’s Health Study. *Cancer Res.* 1993, 53, 4230–4237.
- 617 32. Ghadirian, P.; Lacroix, A.; Maisonneuve, P.; Perret, C.; Potvin, C.; Gravel, D.; Bernard, D.; Boyle, P. Nutritional factors and  
618 colon carcinoma: A case-control study involving French Canadians in Montreal, Quebec, Canada. *Cancer* 1997, 80, 858–864,  
619 doi:10.1002/(SICI)1097-0142(19970901)80:5<858::AID-CNCR5>3.0.CO;2-H.
- 620 33. Brozek-Pluska, B.; Miazek, K.; Musial, J.; Kordek, R. Label-free diagnostics and cancer surgery Raman spectra guidance for the  
621 human colon at different excitation wavelengths. *RSC Adv.* 2019, 9, 40445–40454, doi:10.1039/c9ra06831g.
- 622 34. Brozek-pluska, B.; Musial, J.; Kordek, R.; Abramczyk, H. Analysis of Human Colon by Raman Spectroscopy and Imag-  
623 ing-Elucidation of Biochemical Changes in Carcinogenesis. 2019.
- 624 35. Terry, P.; Jain, M.; Miller, A.B.; Howe, G.R.; Rohan, T.E. Dietary carotenoid intake and colorectal cancer risk. *Nutr. Cancer* 2002,  
625 42, 167–172, doi:10.1207/S15327914NC422\_3.

- 626 36. Shin, A.; Li, H.; Shu, X.O.; Yang, G.; Gao, Y.T.; Zheng, W. Dietary intake of calcium, fiber and other micronutrients in relation to  
627 colorectal cancer risk: Results from the Shanghai Women's Health Study. *Int. J. Cancer* 2006, 119, 2938–2942,  
628 doi:10.1002/ijc.22196.
- 629 37. Malila, N.; Virtamo, J.; Virtanen, M.; Pietinen, P.; Albanes, D.; Teppo, L. Dietary and serum  $\alpha$ -tocopherol,  $\beta$ -carotene and  
630 retinol, and risk for colorectal cancer in male smokers. *Eur. J. Clin. Nutr.* 2002, 56, 615–621, doi:10.1038/sj.ejcn.1601366.
- 631 38. Altman, F.P. Tetrazolium Salts and Formazans. *Prog. Histochem. Cytochem.* 1976, 9, 3–6, doi:10.1016/S0079-6336(76)80015-0.
- 632 39. Berridge, M. V.; Herst, P.M.; Tan, A.S. Tetrazolium dyes as tools in cell biology: New insights into their cellular reduction.  
633 *Biotechnol. Annu. Rev.* 2005, 11, 127–152.
- 634 40. Marshall, N.J.; Goodwin, C.J.; Holt, S.J. A critical assessment of the use of microculture tetrazolium assays to measure cell  
635 growth and function. *Growth Regul.* 1995, 5, 69–84.
- 636 41. Scudiere, D.A.; Shoemaker, R.H.; Paul, K.D.; Monks, A.; Tierney, S.; Nofziger, T.H.; Currens, M.J.; Seniff, D.; Boyd, M.R.  
637 Evaluation of a Soluble Tetrazolium/Formazan Assay for Cell Growth and Drug Sensitivity in Culture Using Human and  
638 Other Tumor Cell Lines. *CANCER Res.* 1988, 48, 4827–4833.
- 639 42. Movasaghi, Z.; Rehman, S.; Rehman, I.U. Raman spectroscopy of biological tissues. *Appl. Spectrosc. Rev.* 2007, 42, 493–541,  
640 doi:10.1080/05704920701551530.
- 641 43. Valko, M.; Rhodes, C.J.; Moncol, J.; Izakovic, M.; Mazur, M. Free radicals, metals and antioxidants in oxidative stress-induced  
642 cancer. *Chem. Biol. Interact.* 2006, 160, 1–40, doi:10.1016/j.cbi.2005.12.009.
- 643 44. Halliwell, B.; Gutteridge, J.M.C. *Free Radicals in Biology and Medicine*; 3rd ed.; Oxford University Press: New York, 1999;
- 644 45. Marnett, L.J. Lipid peroxidation - DNA damage by malondialdehyde. *Mutat. Res. - Fundam. Mol. Mech. Mutagen.* 1999, 424,  
645 83–95, doi:10.1016/S0027-5107(99)00010-X.
- 646 46. Siems, W.G.; Grune, T.; Esterbauer, H. 4-Hydroxynonenal formation during ischemia and reperfusion of rat small intestine.  
647 *Life Sci.* 1995, 57, 785–789, doi:10.1016/0024-3205(95)02006-5.
- 648 47. Stadtman, E.R. Role of Oxidant Species in Aging. *Curr. Med. Chem.* 2004, 11, 1105–1112, doi:10.2174/0929867043365341.
- 649 48. Wang, M.; Dhingra, K.; Hittelman, W.N.; Liehr, J.G.; De Andrade, M.; Li, D. Lipid Peroxidation-induced Putative  
650 Malondialdehyde-DNA Adducts in Human Breast Tissues'. *Cancer Epidemiol. Biomarkers Prev.* 1996, 5, 710.
- 651 49. Jenner, P.; Hunot; Olanow; Beal; Kordower; Tatton; Schapira Oxidative stress in Parkinson's disease. *Ann. Neurol.* 2003, 53,  
652 S26–S36, doi:10.1002/ana.10483.
- 653 50. Lyras, L.; Cairns, N.J.; Jenner, A.; Jenner, P.; Halliwell, B. An assessment of oxidative damage to proteins, lipids, and DNA in  
654 brain from patients with Alzheimer's disease. *J. Neurochem.* 1997, 68, 2061–2069, doi:10.1046/j.1471-4159.1997.68052061.x.
- 655 51. Sayre, L.; Smith, M.; Perry, G. Chemistry and Biochemistry of Oxidative Stress in Neurodegenerative Disease. *Curr. Med.*  
656 *Chem.* 2012, 8, 721–738, doi:10.2174/0929867013372922.
- 657 52. Toshiwal, P.K.; Zarling, E.J. Evidence for increased lipid peroxidation in multiple sclerosis. *Neurochem. Res.* 1992, 17,  
658 205–207, doi:10.1007/BF00966801.
- 659 53. Dhalla, N.S.; Temsah, R.M.; Netticadan, T. Role of oxidative stress in cardiovascular diseases. *J. Hypertens.* 2000, 18, 655–673,  
660 doi:10.1097/00004872-200018060-00002.
- 661 54. Kašparová, S.; Brezová, V.; Valko, M.; Horecký, J.; Mlynárik, V.; Liptaj, T.; Vančová, O.; Uličná, O.; Dobrota, D. Study of the  
662 oxidative stress in a rat model of chronic brain hypoperfusion. *Neurochem. Int.* 2005, 46, 601–611,  
663 doi:10.1016/j.neuint.2005.02.006.
- 664 55. Kerr, S.; Brosnan, M.J.; McIntyre, M.; Reid, J.L.; Dominiczak, A.F.; Hamilton, C.A. Superoxide anion production is increased in  
665 a model of genetic hypertension: Role of the endothelium. *Hypertension* 1999, 33, 1353–1358, doi:10.1161/01.HYP.33.6.1353.
- 666 56. Kukreja, R.C.; Hess, M.L. The oxygen free radical system: From equations through membrane-protein interactions to cardio-  
667 vascular injury and protection. *Cardiovasc. Res.* 1992, 26, 641–655, doi:10.1093/cvr/26.7.641.
- 668 57. Asami, S.; Manabe, H.; Miyake, J.; Tsurudome, Y.; Hirano, T.; Yamaguchi, R.; Itoh, H.; Kasai, H. Cigarette smoking induces an  
669 increase in oxidative DNA damage, 8-hydroxydeoxyguanosine, in a central site of the human lung. *Carcinogenesis* 1997, 18,  
670 1763–1766, doi:10.1093/carcin/18.9.1763.
- 671 58. Andreadis, A.A.; Hazen, S.L.; Comhair, S.A.A.; Erzurum, S.C. Oxidative and nitrosative events in asthma. *Free Radic. Biol.*  
672 *Med.* 2003, 35, 213–225, doi:10.1016/S0891-5849(03)00278-8.
- 673 59. Comhair, S.A.A.; Ricci, K.S.; Arroliga, M.; Lara, A.R.; Dweik, R.A.; Song, W.; Hazen, S.L.; Bleecker, E.R.; Busse, W.W.; Chung,  
674 K.F.; et al. Correlation of systemic superoxide dismutase deficiency to airflow obstruction in asthma. *Am. J. Respir. Crit. Care*  
675 *Med.* 2005, 172, 306–313, doi:10.1164/rccm.200502-1800C.
- 676 60. Comhair, S.A.A.; Xu, W.; Ghosh, S.; Thunnissen, F.B.J.M.; Almasan, A.; Calhoun, W.J.; Janocha, A.J.; Zheng, L.; Hazen, S.L.;  
677 Erzurum, S.C. Superoxide dismutase inactivation in pathophysiology of asthmatic airway remodeling and reactivity. *Am. J.*  
678 *Pathol.* 2005, 166, 663–674, doi:10.1016/S0002-9440(10)62288-2.
- 679 61. Crane, D.; Häussinger, D.; Graf, P.; Sies, H. Decreased Flux through Pyruvate Dehydrogenase by Thiol Oxidation during  
680 t-Butyl Hydroperoxide Metabolism in Perfused Rat Liver. *Hoppe-Seyler's Zeitschrift für Physiol. Chemie* 1983, 364, 977–988,  
681 doi:10.1515/bchm2.1983.364.2.977.
- 682 62. Davies, M.J. Detection of peroxy and alkoxy radicals produced by reaction of hydroperoxides with rat liver microsomal  
683 fractions. *Biochem. J.* 1989, 257, 603–606, doi:10.1042/bj2570603.
- 684 63. Stadtman, E.R. Protein oxidation in aging and age-related diseases. *Ann. N. Y. Acad. Sci.* 2001, 928, 22–38,  
685 doi:10.1111/j.1749-6632.2001.tb05632.x.

- 686 64. Pacher, P.; Beckman, J.S.; Liaudet, L. Nitric oxide and peroxynitrite in health and disease. *Physiol. Rev.* 2007, *87*, 315–424,  
687 doi:10.1152/physrev.00029.2006.
- 688 65. Zhang, S.X.; Wang, J.J.; Dashti, A.; Wilson, K.; Zou, M.H.; Szweda, L.; Ma, J.X.; Lyons, T.J. Pigment epithelium-derived factor  
689 mitigates inflammation and oxidative stress in retinal pericytes exposed to oxidized low-density lipoprotein. *J. Mol.*  
690 *Endocrinol.* 2008, *41*, 135–143, doi:10.1677/JME-08-0011.
- 691 66. Kohen, R.; Nyska, A. Oxidation of biological systems: Oxidative stress phenomena, antioxidants, redox reactions, and methods  
692 for their quantification. *Toxicol. Pathol.* 2002, *30*, 620–650, doi:10.1080/01926230290166724.
- 693 67. McConnell, E.J.; Bittelmeyer, A.M.; Raess, B.U. Irreversible inhibition of plasma membrane (Ca<sup>2+</sup> + Mg<sup>2+</sup>)-ATPase and Ca<sup>2+</sup>  
694 transport by 4-OH-2,3-trans-nonenal. *Arch. Biochem. Biophys.* 1999, *361*, 252–256, doi:10.1006/abbi.1998.0976.
- 695 68. Srinivas, U.S.; Tan, B.W.Q.; Vellayappan, B.A.; Jeyasekharan, A.D. ROS and the DNA damage response in cancer. *Redox Biol.*  
696 *2019*, *25*, 101084, doi:10.1016/j.redox.2018.101084.
- 697 69. Salehi, F.; Behboudi, H.; Kavooosi, G.; Ardestani, S.K. Oxidative DNA damage induced by ROS-modulating agents with the  
698 ability to target DNA: A comparison of the biological characteristics of citrus pectin and apple pectin. *Sci. Rep.* 2018, *8*, 13902,  
699 doi:10.1038/s41598-018-32308-2.
- 700 70. Cannan, W.J.; Tsang, B.P.; Wallace, S.S.; Pederson, D.S. Nucleosomes suppress the formation of double-strand DNA breaks  
701 during attempted base excision repair of clustered oxidative damages. *J. Biol. Chem.* 2014, *289*, 19881–19893,  
702 doi:10.1074/jbc.M114.571588.
- 703 71. Shokolenko, I.; Venediktova, N.; Bochkareva, A.; Wilson, G.I.; Alexeyev, M.F. Oxidative stress induces degradation of mito-  
704 chondrial DNA. *Nucleic Acids Res.* 2009, *37*, 2539–2548, doi:10.1093/nar/gkp100.
- 705 72. Pelicano, H.; Carney, D.; Huang, P. ROS stress in cancer cells and therapeutic implications. *Drug Resist. Updat.* 2004, *7*, 97–110,  
706 doi:10.1016/j.drug.2004.01.004.
